# Supplementary material for: The Effect of Reduced Fibrinogen on Cerebrovascular Permeability during Traumatic Brain Injury in Fibrinogen Gene Heterozygous Knockout Mice
Source: MDPI journal article supplement (doi:10.3390/biom14040385), 2024-03-22
Supplement: s1 [file s1]

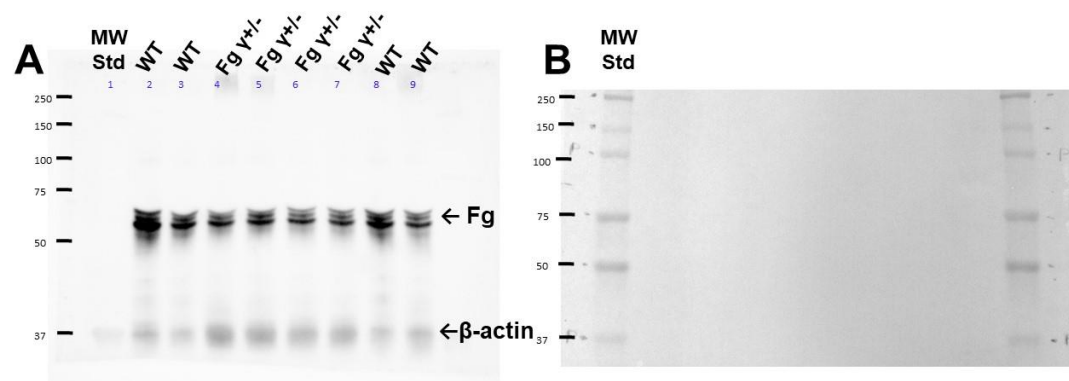

**Figure S1.** Original Western blot image of Figure 1a with marked (A) Fg and (B) β-actin molecular weight standard.

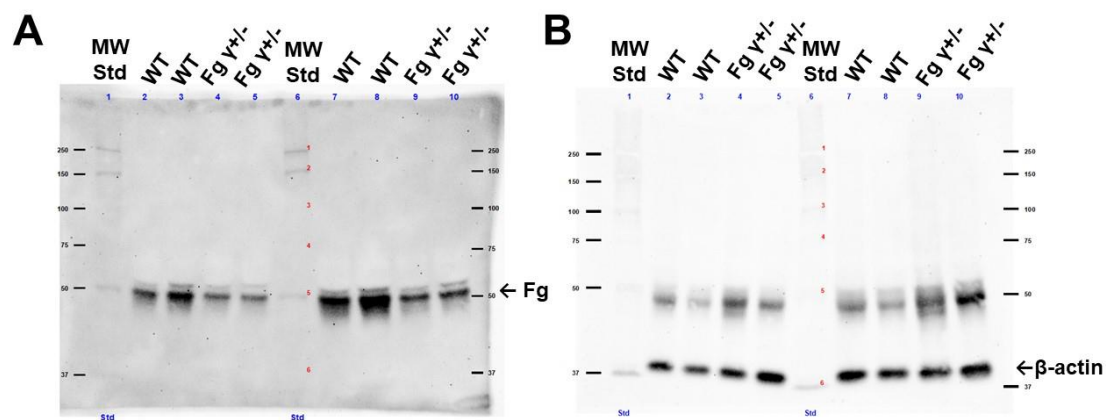

**Figure S2.** Original Western blot image of Figure 1c with marked (A) Fg and (B) β-actin.

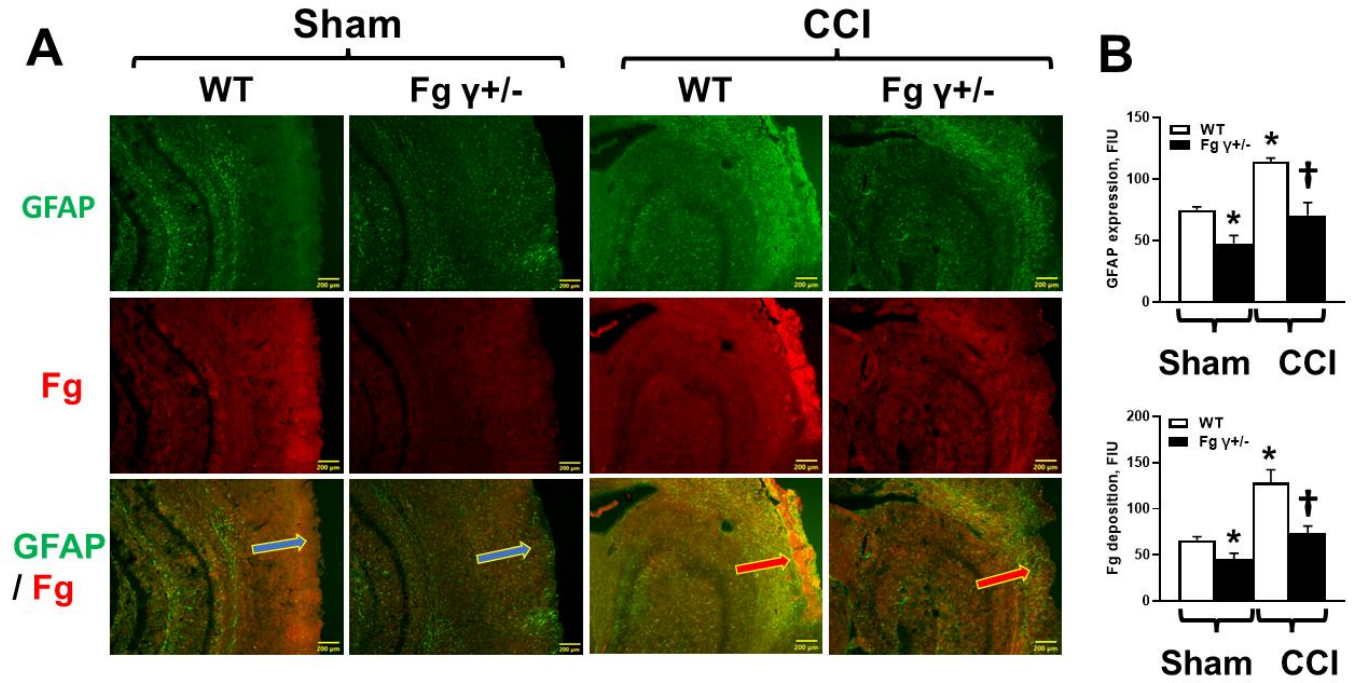

**Figure S3.** Expression of glial fibrillary acidic protein (GFAP-green) and deposition of fibrinogen (Fg-red) in ipsilateral brain cortical sections 14 days after cortical contusion injury (CCI) or sham-operation (Sham). **(A)** Representative images show marked increases in the expression of GFAP and the deposition of Fg in the cortex of wild-type (WT) mice with CCI in comparison to those in the Fg gamma-chain-knock out (Fg  $\gamma^{+/-}$ ) mice after injury. Red arrows show the pericontusional area in injured animals while blue arrows indicate similar location in sham-operated mice. **(B)** Summary of GFAP and Fg fluorescence intensity values in the WT and Fg  $\gamma^{+/-}$  after CCI and sham-operation.  $p < 0.05$  in all; \* - vs. WT Sham; † - vs. WT CCI;  $n = 4$ .

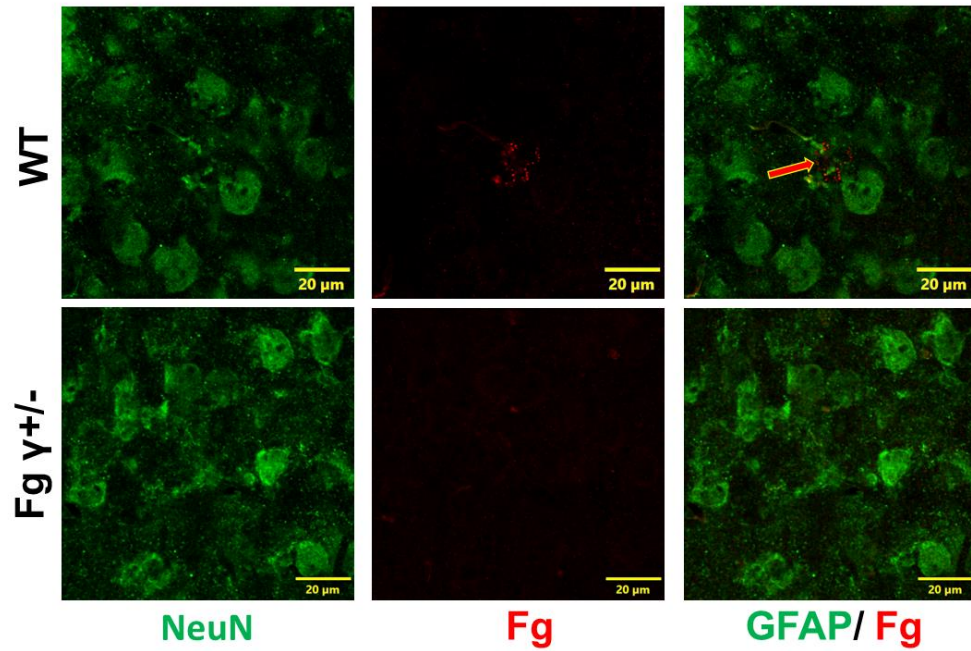

**Figure S4.** Expression of neuronal nuclei (NeuN-green) and fibrinogen (Fg-red) in ipsilateral brain cortical sections 14 days after cortical contusion injury (CCI). The red arrow indicates deposition of Fg in areas away from the neuron's body.
